# Supplementary material
Source: PubMed Central journal article supplement (PMC6637013)
Supplement: AET2-3-251-s001.pdf [file AET2-3-251-s001.pdf]

**PEM POCUS Curriculum Delphi – Data Collection Sheet**

**A. Inclusion/Exclusion:**

Do you meet the following criteria?

- >3 years experience directly involved in teaching POCUS to PEM fellows
- *OR* PEM POCUS director/leader at your site
- *OR* PEM POCUS Fellowship trained

*AND*

- Performed at least 1000 pediatric POCUS scans

YES – You are eligible to complete this survey.

NO – You are not eligible to complete this survey.

**B. Demographics:**

1. In which country do you currently work? (Please select one)

- USA
- Canada
- Other:

2. How many years have you been in practice outside of residency/fellowship? (select one, please round up to the nearest number)

- \_\_\_\_\_

3. What non-ultrasound residency training have you received (select all that apply):

- Pediatrics
- Emergency Medicine
- Pediatric Emergency Medicine
- Other:

4. What type of ultrasound training and/or certification have you received? (select all that apply)

- PEM POCUS fellowship
- EM POCUS fellowship
- PEM fellowship rotation
- Longitudinal US training within PEM fellowship
- Longitudinal US training during EM residency
- 1 or 2-day intro course
- Self-trained
- Other:

5. Are you RDMS Certified?

- Yes
- No

6. Approximately how many **total** point-of-care ultrasound scans have you performed to date?

- 1001-1250
- 1251-1500
- 1501-1750
- 1751-2000
- >2001

7. Approximately how many **Pediatric** point-of-care ultrasound scans have you performed to date?

- 1001-1250
- 1251-1500
- 1501-1750
- 1751-2000
- >2001

8. Are you actively involved in ultrasound education of PEM fellows and/or PEM POCUS fellows?

- Yes
- No

9a. If yes, for how many years have you been involved in this role?

- \_\_\_\_\_

9b. If no, for how many years were you involved in this role?

- \_\_\_\_\_

10. In which of the following areas have you been involved with curriculum development?  
(select all that apply)

- Pediatric residency
- EM residency
- PEM fellowship
- PEM POCUS fellowship
- EM POCUS fellowship

9. Does your institution have any of the following fellowships? (select all that apply)

- PEM
- PEM POCUS
- EM POCUS
- None of the above

C. Skills and Applications List

Please rate the level of importance of the following skills or applications as they relate to a PEM fellowship. 1=not at all important, 2= not very important 3=somewhat important 4= very important.

**Resuscitative Applications**

| <b><u>Skill/Application</u></b>   | <b><u>1</u></b> | <b><u>2</u></b> | <b><u>3</u></b> | <b><u>4</u></b> |
|-----------------------------------|-----------------|-----------------|-----------------|-----------------|
| Trauma:                           |                 |                 |                 |                 |
| 1. Identify free peritoneal fluid |                 |                 |                 |                 |
| 2. Identify pericardial effusion  |                 |                 |                 |                 |
| 3. Identify hemothorax            |                 |                 |                 |                 |
| 4. Identify pneumothorax          |                 |                 |                 |                 |
| Focused Cardiac:                  |                 |                 |                 |                 |
| 5. Identify pericardial effusion  |                 |                 |                 |                 |
| 6. Identify cardiac standstill    |                 |                 |                 |                 |
| 7. Evaluate cardiac function      |                 |                 |                 |                 |
| Volume Status:                    |                 |                 |                 |                 |
| 8. Assess IVC for volume status   |                 |                 |                 |                 |
| 9. Assess IVC to Aorta ratio      |                 |                 |                 |                 |

**Diagnostic Applications**

| <b><u>Skill/Application</u></b>      | <b><u>1</u></b> | <b><u>2</u></b> | <b><u>3</u></b> | <b><u>4</u></b> |
|--------------------------------------|-----------------|-----------------|-----------------|-----------------|
| Soft Tissue:                         |                 |                 |                 |                 |
| 1. Identify cellulitis               |                 |                 |                 |                 |
| 2. Identify abscess                  |                 |                 |                 |                 |
| 3. Identify soft tissue foreign body |                 |                 |                 |                 |
| 4. Identify necrotizing fasciitis    |                 |                 |                 |                 |
| 5. Identify myositis                 |                 |                 |                 |                 |
| Neck:                                |                 |                 |                 |                 |
| 6. Identify peritonsillar abscess    |                 |                 |                 |                 |
| 7. Identify adenitis                 |                 |                 |                 |                 |
| Pulmonary:                           |                 |                 |                 |                 |
| 8. Identify pleural fluid/effusion   |                 |                 |                 |                 |
| 9. Identify pulmonary edema          |                 |                 |                 |                 |
| 10. Identify lung consolidation      |                 |                 |                 |                 |
| Urinary Tract:                       |                 |                 |                 |                 |
| 11. Assess bladder volume            |                 |                 |                 |                 |
| 12. Identify hydronephrosis          |                 |                 |                 |                 |

|                                                   |  |  |  |  |
|---------------------------------------------------|--|--|--|--|
| Focused Abdomen:                                  |  |  |  |  |
| 13. Identify appendicitis                         |  |  |  |  |
| 14. Identify pyloric stenosis                     |  |  |  |  |
| 15. Identify intussusception                      |  |  |  |  |
| 16. Identify Abdominal Aortic Aneurysm (AAA)      |  |  |  |  |
| Hepatobiliary Tract:                              |  |  |  |  |
| 17. Identify cholelithiasis                       |  |  |  |  |
| 18. Identify cholecystitis                        |  |  |  |  |
| Skull:                                            |  |  |  |  |
| 19. Identify skull fracture                       |  |  |  |  |
| Musculoskeletal:                                  |  |  |  |  |
| 20. Identify bone fractures                       |  |  |  |  |
| 21. Identify joint effusions                      |  |  |  |  |
| Deep Venous:                                      |  |  |  |  |
| 22. Identify deep vein thrombosis                 |  |  |  |  |
| Ocular:                                           |  |  |  |  |
| 23. Identify retinal detachment                   |  |  |  |  |
| 24. Identify vitreous hemorrhage                  |  |  |  |  |
| 25. Identify vitreous detachment                  |  |  |  |  |
| 26. Identify lens dislocation                     |  |  |  |  |
| 27. Evaluate optic nerve for papilledema          |  |  |  |  |
| Female pelvis:                                    |  |  |  |  |
| 28. Assess for ovarian cyst/mass                  |  |  |  |  |
| 29. Assess for ovarian torsion                    |  |  |  |  |
| 30. Identify intrauterine pregnancy               |  |  |  |  |
| 31. Determine viability of intrauterine pregnancy |  |  |  |  |
| 32. Identify adnexal abscess                      |  |  |  |  |
| Male Genitourinary:                               |  |  |  |  |
| 33. Identify testicular torsion                   |  |  |  |  |
| 34. Identify testicular mass                      |  |  |  |  |
| 35. Identify epididymo-orchitis                   |  |  |  |  |

**POCUS Assisted/Guided Procedural Applications**

| <b><u>Skill/Application</u></b>  | <b><u>1</u></b> | <b><u>2</u></b> | <b><u>3</u></b> | <b><u>4</u></b> |
|----------------------------------|-----------------|-----------------|-----------------|-----------------|
| 1. Central line placement        |                 |                 |                 |                 |
| 2. Peripheral IV access          |                 |                 |                 |                 |
| 3. Abscess incision and drainage |                 |                 |                 |                 |
| 4. Suprapubic bladder aspiration |                 |                 |                 |                 |
| 5. Lumbar puncture               |                 |                 |                 |                 |

|                                            |  |  |  |  |
|--------------------------------------------|--|--|--|--|
| 6. Endotracheal tube position confirmation |  |  |  |  |
| 7. Nerve blocks                            |  |  |  |  |
| 8. Arthrocentesis                          |  |  |  |  |
| 9. Thoracentesis                           |  |  |  |  |
| 10. Paracentesis                           |  |  |  |  |
| 11. Fracture reduction                     |  |  |  |  |
| 12. Pericardiocentesis                     |  |  |  |  |
| 13. IO needle confirmation                 |  |  |  |  |
| 14. Arterial lines                         |  |  |  |  |
| 15. Peritonsillar abscess drainage         |  |  |  |  |
| 16. Foreign body localization and removal  |  |  |  |  |

Are there any other skills or applications you feel should be included in a PEM Fellowship POCUS curriculum?

---
